# Supplementary material for: The telomeric protein Pot1 from Schizosaccharomyces pombe binds ssDNA in two modes with differing 3′ end availability
Source: PubMed Central journal article supplement — Nucleic Acids Res. 2014 Jul 29;42(15):9656–65. doi: 10.1093/nar/gku680 (PMC4150783; doi:10.1093/nar/gku680), 2014-07-29
Supplement: supp_gku680_nar-01232-f-2014-File008.pdf [file supp_gku680_nar-01232-f-2014-File008.pdf]

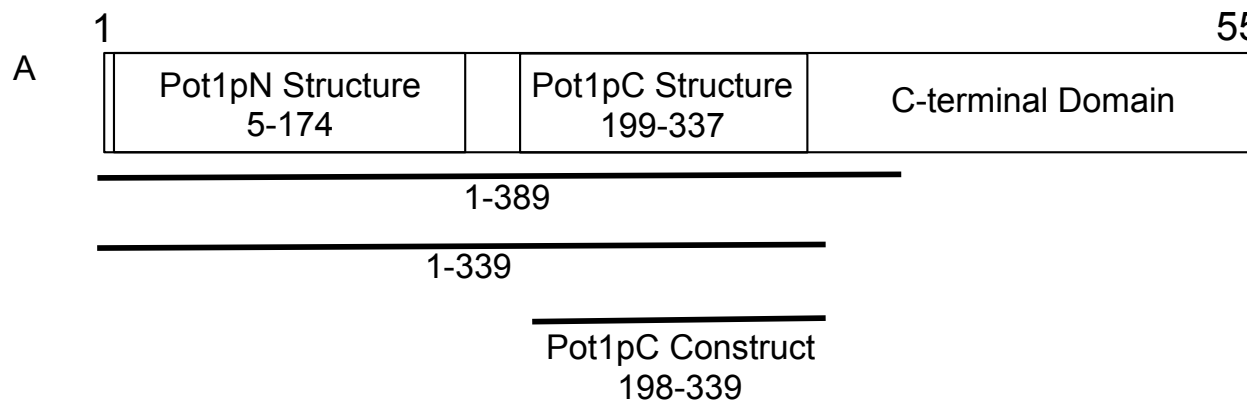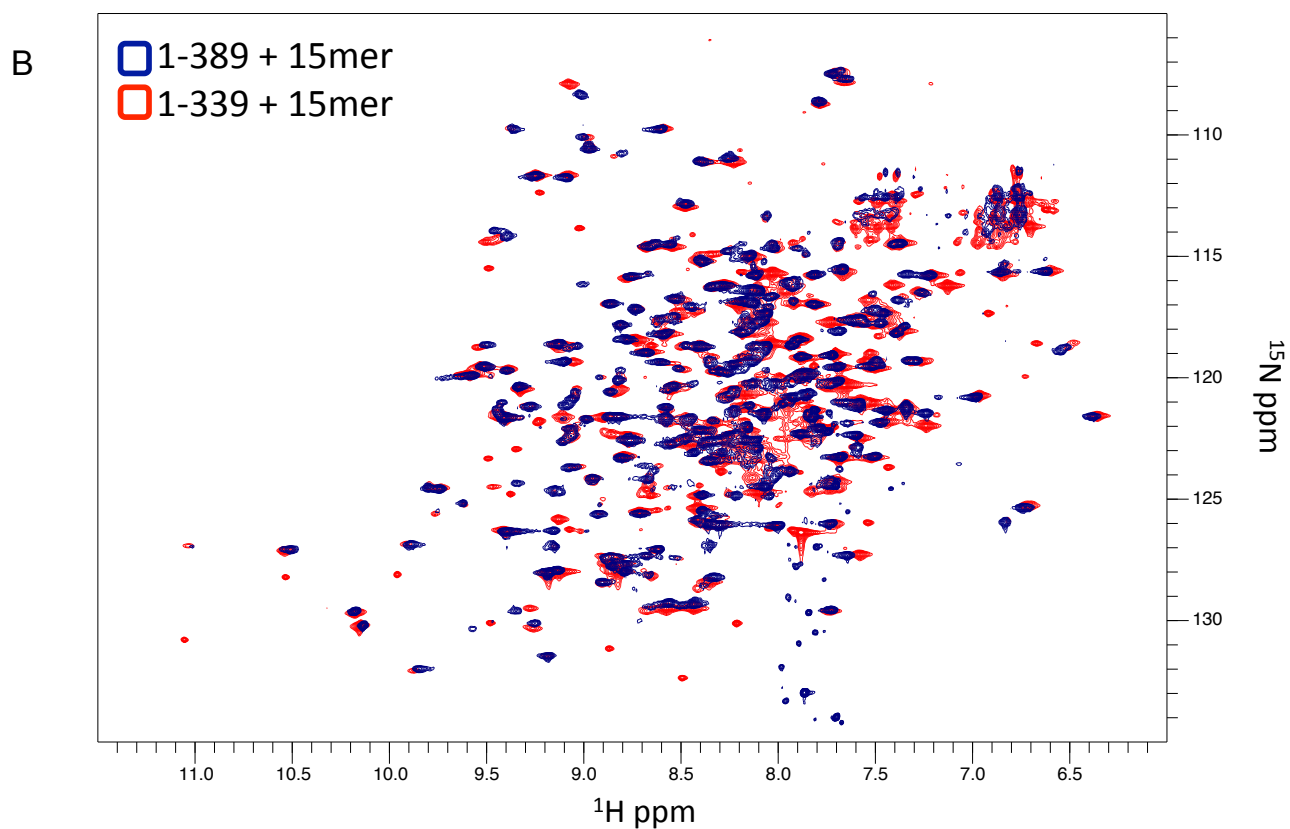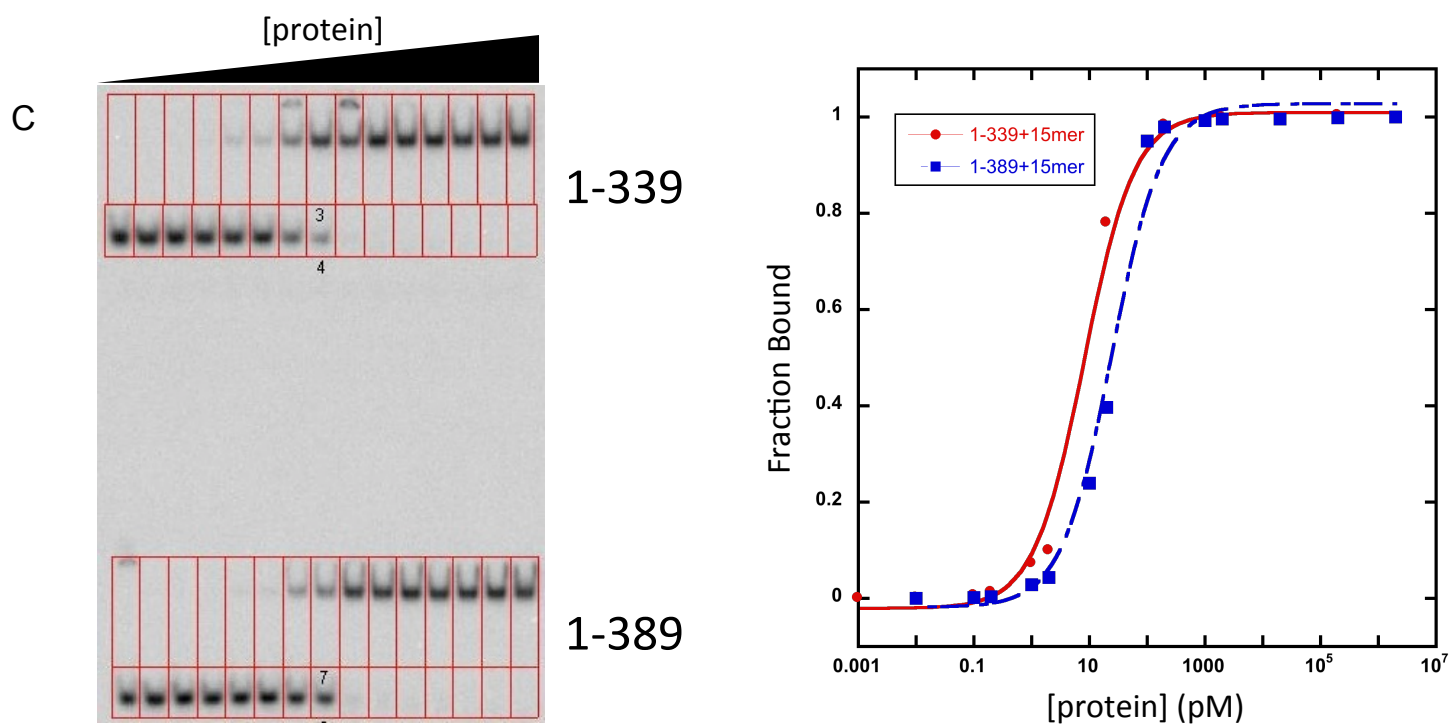

Supplementary Figure 2

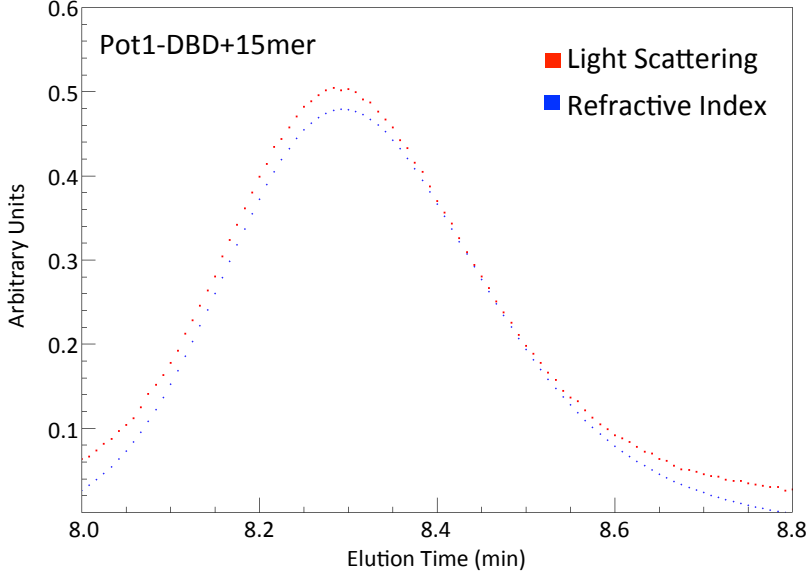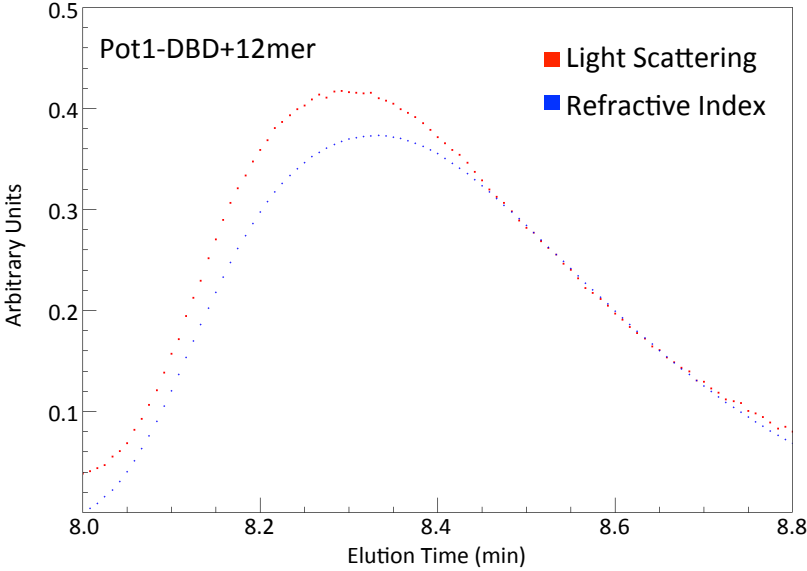

## Supplementary Figure Legends

Supplementary Figure 1. Characterization of the new 1-339 Pot1-DBD construct. A) The domain map of Pot1 shows the location of the new construct relative to previous studied constructs (1-3). B) The <sup>15</sup>N -HSQC spectrum of 1-339 closely resembles that of 1-389, suggesting the same global fold. Weak peaks are due to chitin-binding domain contamination. C) Representative EMSA and fitted curves from EMSA data illustrate the similarity in DNA-binding activity between constructs.

Supplementary Figure 2. The offset refractive index and light scattering traces of Pot1-DBD+12mer indicate mixture of species not seen in the Pot1-DBD+15mer complex. Conditions are the same as Figure 3B (34 μM Pot1-DBD, 20 mM Tris-HCl pH 8.0, 400 mM NaCl).

## Supplementary Tables

Supplementary Table 1. Shifted residues from Figure 1C

| Shifted >0.5 ppm | Split Peaks | Unassigned in Pot1-DBD only | Unassigned in pN and DBD | Unassigned in pC and DBD |
|------------------|-------------|-----------------------------|--------------------------|--------------------------|
| Val6             | Ile207      | Thr41                       | Ser8                     | Ser200                   |
| Ile7             | Asp269      | Gly47                       | Gly23                    | Phe201                   |
| Phe52            | Thr292      | Ile48                       | Glu24                    | Arg212                   |
| Arg118           | Lys293      | Cys76                       | Phe27                    | Asp226                   |
| Gln120           | Glu301      | Leu105                      | Leu36                    | Lys227                   |
| Ser202           |             | Ile110                      | Gln37                    | Asp235                   |
| Leu203           |             | Val290                      | Lys38                    | Tyr248                   |
| His212           |             | Arg291                      | Lys39                    | Thr249                   |
| Glu270           |             |                             | Asn40                    | Ser250                   |
| His271           |             |                             | Val49                    | Ser251                   |
| Ile294           |             |                             | Lys50                    | Ser252                   |
| Leu304           |             |                             | Ser55                    | Arg255                   |
| Ser315           |             |                             | Glu64                    | Gly256                   |
|                  |             |                             | Trp65                    | Asn277                   |
|                  |             |                             | Tyr70                    | His296                   |
|                  |             |                             | Trp72                    | His305                   |
|                  |             |                             | Asp73                    | Gly306                   |
|                  |             |                             | Asp77                    | Asp307                   |
|                  |             |                             | Thr78                    | Ser308                   |
|                  |             |                             | Ser79                    | Ala309                   |
|                  |             |                             | Ser80                    | Lys310                   |
|                  |             |                             | Ile81                    | Arg311                   |
|                  |             |                             | Gly82                    | Tyr312                   |
|                  |             |                             | Leu83                    | Asn313                   |
|                  |             |                             | Gln84                    | Met314                   |
|                  |             |                             | Lys90                    |                          |
|                  |             |                             | Asn93                    |                          |
|                  |             |                             | Gly102                   |                          |

| Shifted >0.5 ppm | Split Peaks | Unassigned in Pot1-DBD only | Unassigned in pN and DBD | Unassigned in pC and DBD |
|------------------|-------------|-----------------------------|--------------------------|--------------------------|
|                  |             |                             | Gln103                   |                          |
|                  |             |                             | His108                   |                          |
|                  |             |                             | Gln109                   |                          |
|                  |             |                             | Arg116                   |                          |
|                  |             |                             | Asp117                   |                          |
|                  |             |                             | Gln126                   |                          |
|                  |             |                             | Phe127                   |                          |
|                  |             |                             | Asp134                   |                          |
|                  |             |                             | Phe135                   |                          |
|                  |             |                             | Ser136                   |                          |
|                  |             |                             | Asn138                   |                          |
|                  |             |                             | Ser139                   |                          |
|                  |             |                             | Lys140                   |                          |
|                  |             |                             | Asp141                   |                          |
|                  |             |                             | Thr142                   |                          |
|                  |             |                             | Leu143                   |                          |
|                  |             |                             | Cys144                   |                          |
|                  |             |                             | Gln146                   |                          |
|                  |             |                             | Met148                   |                          |
|                  |             |                             | Lys153                   |                          |
|                  |             |                             | Asp156                   |                          |
|                  |             |                             | Lys157                   |                          |
|                  |             |                             | Lys167                   |                          |
|                  |             |                             | Ile168                   |                          |
|                  |             |                             | Trp169                   |                          |
|                  |             |                             | Asp170                   |                          |
|                  |             |                             | Glu171                   |                          |
|                  |             |                             | Gln172                   |                          |
|                  |             |                             | Thr173                   |                          |
|                  |             |                             | Asn174                   |                          |

Supplementary Table 2. Binding affinities for Pot1-DBD constructs tested

| Protein Construct  | 15mer K <sub>D</sub> (pM) <sup>a</sup> | Fold change <sup>b</sup> | 12mer K <sub>D</sub> (pM) <sup>a</sup> | Fold change <sup>c</sup> |
|--------------------|----------------------------------------|--------------------------|----------------------------------------|--------------------------|
| Pot1-DBD_WT        | 4 ± 1                                  | -                        | 5 ± 1                                  | -                        |
| Pot1-DBD_Y224A     | 3.2 ± 0.7                              | 0.88                     | 5.9 ± 0.5                              | 1.3                      |
| Pot1-DBD_linkerdel | 1.3 ± 0.5                              | 0.37                     | 3.2 ± 0.7                              | 0.70                     |

<sup>a</sup> Apparent K<sub>D</sub> values are averaged from triplicate EMSA experiments. Representative data are shown in Figures 2 and 5.

<sup>b</sup> Fold change is relative to the Pot1-DBD\_WT+15mer affinity

<sup>c</sup> Fold change is relative to the Pot1-DBD\_WT+12mer affinity

## Supplementary References

1. Lei, M., Podell, E.R., Baumann, P. and Cech, T.R. (2003) DNA self-recognition in the structure of Pot1 bound to telomeric single-stranded DNA. *Nature*, **426**, 198–203.
2. Dickey, T.H., McKercher, M.A. and Wuttke, D.S. (2013) Nonspecific Recognition Is Achieved in Pot1pC through the Use of Multiple Binding Modes. *Structure*, **21**, 121–132.
3. Croy, J.E., Podell, E.R. and Wuttke, D.S. (2006) A new model for *Schizosaccharomyces pombe* telomere recognition: the telomeric single-stranded DNA-binding activity of Pot11-389. *J. Mol. Biol.*, **361**, 80–93.
